# Supplementary material
Source: publisher figshare collection journal article supplement (https://acs.figshare.com/ndownloader/files/5831505)
Supplement: Supplementary file 1 [file 5831505]

# Regioselective Aromatic Borylation in an Inert Solvent

Man Kin Tse, Jian-Yang Cho, and Milton R. Smith, III*

*Department of Chemistry, Michigan State University, East Lansing, MI 48824*

**Supporting Information**

**Experimental Section**

**General Considerations.** Catalytic reaction mixtures were prepared in a glove box. Cp*Rh(-C6Me6) was prepared according to the literature method.[[1]](#footnote-2) PPh3 was recrystallized from pentane before use. HBPin was purchased from Aldrich, and further purified by stirring with PPh3 to remove BH3. HBPin was vacuum transferred at room temperature to give the borane as a clear viscous liquid. Cyclohexane (spectrophotometric grade) was purchased from Mallinckrodt and was washed with equal volumes of conc. H2SO4 until the washings were colorless, followed by water (3 x 100 mL), 5% NaOH (100 mL), and again water (3 x 100 mL) until the pH of the aqueous phase was neutral. After preliminary drying with MgSO4 and refluxing over Na, the cyclohexane was vacuum transferred at room temperature and passed through a column of activated alumina. Benzene, 1,3-dimethoxybenzene, and 3-methylanisole were distilled from sodium metal. *m*-Xylene was distilled and passed through a column of activated alumina. 1,3-Bis(trifluoromethyl)benzene and 1,3-dichlorobenzene were distilled, dried over 4Å sieves, and vacuum transferred to an air free flask. Veratrole was distilled from CaH2 under N2. *N,N*-Dimethyl-*m*-anisidine,[[2]](#footnote-3) *N,N,N’,N’*-tetramethyl-1,3-phenylenediamine[[3]](#footnote-4) and *N*-tri-*iso*-propylpyrrole[[4]](#footnote-5) were prepared according to literature methods and vacuum distilled before use. CDCl3 was vacuum transferred after drying over 3Å sieves.

1H and 13C NMR spectra were recorded on a Varian Inova-300 and Varian Germini-300 spectrometers (300.11 and 75.43 MHz respectively) and referenced to residual solvent signals. 11B spectra were recorded on a Varian VXR-300 operating at 96.29 MHz and were referenced to neat BF3.Et2O as the external standard. Elemental analyses were performed at Michigan State University using a Perkin Elmer Series II CHNS/O Analyzer 2400. GC-MS data were obtained using an HP G1800B GCD system and GC-FID data were obtained using an HP 6890 GC system. HRMS data were obtained at the Michigan State University Mass Spectrometry Facility, which is supported, in part, by a grant (DRR-00480) from the Biotechnology Research Technology Program, National Center for Research Resources, National Institutes of Health.

**Arylboronate Ester Syntheses**

The general procedure for the synthesis of arylboronate esters, catalyzed by Cp*Rh(4-C6Me6), is illustrated for the synthesis of 5-(4,4,5,5-tetramethyl-1,3,2-dioxaborolyl)-1,3-dimethoxybenzene. Cp*Rh(4-C6Me6) (5.0 mg, 0.012 mmol), 1,3-dimethoxybenzene (97 mg, 0.70 mmol) and HBPin (269 mg, 2.10 mmol) were dissolved in cyclohexane (1 mL) and transferred to an air-free flask. After heating for 32 h at 150 °C, the product ratio of 1,3,5-C6H3(OMe)2(BPin):1,3,4-C6H3(OMe)2(BPin), determined by GC-FID of the crude reaction mixture, was 89:11. The solvent was then removed under vacuum at room temperature, and the residue was chromatographed on silica gel (60-200 mesh) column, using hexanes to hexanes:ethyl acetate (9:1) as the gradient eluent. Solvent removal gave 1,3,5-C6H3(OMe)2(BPin) as a white solid (114 mg, 62% based on 1,3-dimethoxybenzene). mp 88-90 °C. *Rf* = 0.40 (hexanes:ethyl acetate = 9:1). 1H NMR (CDCl3)  1.32 (s, 12 H, BO2C6H12), 3.79 (s, 6 H, 2 OCH3), 6.55 (t, *J* = 2.4 Hz, 1 H), 6.93 (d, *J* = 2.4 Hz, 2 H). 13C NMR (CDCl3)  24.82, 55.40, 83.87, 104.50, 111.53, 160.35. 11B NMR (CDCl3)  30.8. Elemental analysis for C14H21BO4 calcd.C (63.66%), H (8.01%), N (0.00%). Found C (63.58%), H (8.25%), N (0.01%). GC-MS (*m/z*) 264. 1,3,4-C6H3(OMe)2(BPin) was isolated as a colorless oil (3 mg, 2% based on 1,3-dimthoxybenzene). *Rf* = 0.17 (hexanes:ethyl acetate = 9:1). 1H NMR (CDCl3)  1.31 (s, 12 H, BO2C6H12), 3.79 (s, 3 H, OCH3), 3.80 (s, 3 H, OCH3), 6.38 (d, *J* = 2.2 Hz, 1 H), 6.46 (dd, *J* = 8.1, 2.2 Hz, 1 H), 7.62 (d, *J* = 8.1 Hz, 1 H). 13C NMR (CDCl3)  24.79, 55.23, 55.74, 83.12, 98.02, 104.34, 138.35, 163.62, 165.93. 11B NMR (CDCl3)  30.8. GC-MS (*m/z*) 264.

**(4,4,5,5-Tetramethyl-1,3,2-dioxaborolyl)benzene.**[[5]](#footnote-6) Method 1: Borylation of benzene (109 mg, 1.4 mmol) with HBPin (45 mg, 0.35 mmol) was catalyzed by Cp*Rh(4-C6Me6) (5.0 mg, 0.012 mmol) in cyclohexane (0.5 mL) in a J. Young NMR tube at 150 °C for 38 h. The product ratio of PhBPin, 1,3-C6H4(BPin)2 and 1,4-C6H4(BPin)2, determined by GC-FID of the crude reaction mixture, was 93:5:2. PhBPin (42 mg, 59%) was isolated as colorless oil after chromatography on silica gel using hexanes as the eluent. *Rf* = 0.17 (hexanes). 1H NMR (CDCl3)  1.35 (s, 12 H, BO2C6H12), 7.34-7.39 (m, 2 H), 7.43-7.49 (m, 1 H), 7.81-7.84 (m, 2 H). GC-MS (*m/z*) 204. Method 2: Catalytic borylation of benzene (60 mg, 0.77 mmol) with HBPin (90 mg, 0.70 mmol) catalyzed by Cp*Rh(4-C6Me6) (5.9 mg, 0.014 mmol) in cyclohexane (0.5 mL) at 150 °C for 87 h. PhBPin (59 mg, 41%) was isolated as a colorless oil. An isomer mixture of diborylated products C6H4(BPin)2 was also isolated (39 mg, 33%). *m*-C6H4(BPin)2:*p*-C6H4(BPin)2 = 2:1 (determined by 1H NMR integrations). *m*-C6H4(BPin)2: *Rf* = 0.09 (hexanes). 1H NMR (CDCl3)  1.32 (s, 24 H, 2 BO2C6H12), 7.36 (t, *J* = 7.3 Hz, 1 H), 7.88 (dd, *J* = 7.3, 1.4 Hz, 2 H), 8.26 (s, 1 H). *p*-C6H4(BPin)2: *Rf* = 0.09 (hexanes). 1H NMR (CDCl3)  1.33 (s, 24 H, 2 BO2C6H12), 7.79 (s, 4 H). Method 3: Catalytic borylation of benzene (55 mg, 0.70 mmol) with HBPin (270 mg, 2.1 mmol) catalyzed by Cp*Rh(4-C6Me6) (15.0 mg, 0.025 mmol) in cyclohexane (1 mL) at 150 °C for 61 h. The product ratio of PhBPin, 1,3-C6H4(BPin)2, 1,4-C6H4(BPin)2 and 1,3,5-C6H3(BPin)3 determined by GC-FID of the crude reaction mixture, was 3:24:32:41. A dark brown solid (311 mg) was obtained after removal of solvent under vacuum at room temperature. The product ratio of 1,3-C6H4(BPin)2, 1,4-C6H4(BPin)2 and 1,3,5-C6H3(BPin)3 determined by 1H NMR of the crude product was 26:27:43. 1,3,5-C6H3(BPin)3: 1H NMR (CDCl3)  1.31 (s, 36 H, 3 BO2C6H12), 8.35 (s, 3 H).

**5-(4,4,5,5-Tetramethyl-1,3,2-dioxaborolyl)-1,3-bis(trifluoromethyl)benzene.[[6]](#footnote-7)** In a J. Young NMR tube, borylation of 1,3-bis(trifluoromethyl)benzene (75 mg, 0.35 mmol) with HBPin (45 mg, 0.35 mmol) in cyclohexane (0.5 mL) was catalyzed by Cp*Rh(4-C6Me6) (5.0 mg, 0.012 mmol) at 150 °C for 10 h. 1,3,5-C6H3(CF3)2(BPin) (105 mg, 88%) was isolated as a colorless solid after chromatography on silica gel using CH2Cl2 as the eluent. No other isomers were detected by GC-MS of the crude reaction mixture. 1H NMR (CDCl3)  1.35 (s, 12 H, BO2C6H12), 7.93 (s, 1 H), 8.22 (s, 1 H). GC-MS (*m/z*) 340.

**5-(4,4,5,5-Tetramethyl-1,3,2-dioxaborolyl)-*m*-xylene (isomer mixture).6** In a J. Young NMR tube, the borylation of *m*-xylene (75 mg, 0.70 mmol) with HBPin (90 mg, 0.70 mmol) in cyclohexane (0.5 mL) was catalyzed by Cp*Rh(4-C6Me6) (10.0 mg, 0.025 mmol) at 150 °C for 59 h. The product ratio of 1,3,5-C6H3(CH3)2(BPin) and 1,3-C6H3(CH3)(CH2BPin), determined by GC-FID of the crude reaction mixture, was 94:6. 1,3,5-C6H3(CH3)2(BPin) and 1,3-C6H3(CH3)(CH2BPin) (91 mg, 56%) were isolated as a solid mixture of isomers after chromatography on silica gel using hexanes as the eluent. 1,3,5-C6H3(CH3)2(BPin): *Rf* = 0.41 (hexanes). 1H NMR (CDCl3)  1.33 (s, 12 H, BO2C6H12), 2.30 (s, 6 H, 2 CH3), 7.09 (s, 1 H), 7.42 (s, 1 H). GC-MS (*m/z*) 232.

**4-(4,4,5,5-Tetramethyl-1,3,2-dioxaborolyl)veratrole.** Method 1:In a J. Young NMR tube, the borylation of veratrole (97 mg, 0.70 mmol) with HBPin (90 mg, 0.70 mmol) was catalyzed by Cp*Rh(4-C6Me6) (5.0 mg, 0.012 mmol) in cyclohexane (0.5 mL) at 150 °C for 37 h. The product ratio of 1,2,4-C6H3(OCH3)2(BPin) to an unidentified mono-borylated product, determined by GC-FID of the crude reaction mixture, was 98:2. 1,2,4-C6H3(OCH3)2(BPin) (118 mg, 64%) was isolated as a colorless solid after chromatography on silica gel using a hexanes-ethyl acetate eluent gradient from 20:1 to 10:1. 1,2,4-C6H3(OCH3)2(BPin): mp 74-77 °C. *Rf* = 0.23 (hexanes:ethyl acetate = 9:1). 1H NMR (CDCl3)  1.32 (s, 12 H, BO2C6H12), 3.88 (s, 3 H, OCH3), 3.90 (s, 3 H, OCH3), 6.86 (d, *J* = 8.0 Hz, 1 H), 7.26 (d, *J* = 1.5 Hz, 1 H), 7.40 (dd, *J* = 8.0, 1.5 Hz, 1 H). 13C NMR (CDCl3)  24.82, 55.71, 55.81, 83.63, 110.42, 116.46, 128.52, 148.28, 151.59. 11B NMR (CDCl3)  30.3. Elemental analysis for C14H21BO4 calcd. C (63.66%), H (8.01%), N (0.00%). Found C (63.41%), H (8.18%), N (0.01%). GC-MS (*m/z*) 264. Method 2: In an air-free flask, the borylation of veratrole (97 mg, 0.70 mmol) with HBPin (270 mg, 2.1 mmol) was catalyzed by Cp*Rh(4-C6Me6) (10.0 mg, 0.025 mmol) in cyclohexane (1 mL) at 150 °C for 45 h. The product ratio of 1,2,4-C6H3(OCH3)2(BPin) to an unidentified mono-borylated product, determined by GC-FID of the crude reaction mixture, was 99:1. 1,2,4-C6H3(OCH3)2(BPin) (153 mg, 82%) was isolated as a colorless solid.

**5-(4,4,5,5-Tetramethyl-1,3,2-dioxaborolyl)-3-methylanisole.** In an air-free flask, the borylation of 3-methylanisole (86 mg, 0.70 mmol) with HBPin (113 mg, 0.88 mmol) was catalyzed by Cp*Rh(4-C6Me6) (15.0 mg, 0.037 mmol) in cyclohexane (1 mL) at 150 °C for 25 h. The product ratio of 1,3,5-C6H3(CH3)(OCH3)(BPin) to other unidentified mono-borylated products, determined by GC-FID of the crude reaction mixture, was 92:5:3. 1,3,5-C6H3(OCH3)(CH3)(BPin) (93 mg, 54%) was isolated as a colorless solid after chromatography on silica gel using hexanes to hexanes:ethyl acetate (20:1) as the gradient eluent. 1,3,5-C6H3(OCH3)(CH3)(BPin): mp 55-56 °C. *Rf* = 0.52 (hexanes:ethyl acetate = 20:1). 1H NMR (CDCl3)  1.33 (s, 12 H, BO2C6H12), 2.31 (s, 3 H, CH3), 3.80 (s, 3 H, OCH3), 6.82 (m, 1 H), 7.11 (d, *J* = 2.5 Hz, 1 H), 7.22 (m, 1 H). 13C NMR (CDCl3)  21.21, 24.83, 55.23, 83.76, 115.48, 118.79, 128.01, 138.91, 159.13. 11B NMR (CDCl3)  30.9. Elemental analysis for C14H21BO3 calcd. C (67.77%), H (8.53%), N (0.00%). Found C (67.54%), H (8.53%), N (0.02%). GC-MS (*m/z*) 248.

**5-(4,4,5,5-Tetramethyl-1,3,2-dioxaborolyl)-*m*-*N*,*N*-dimethylanisidine.** In an air-free flask, the borylation of *m*-*N*,*N*-dimethylanisidine2 (90 mg, 0.60 mmol) with HBPin (305 mg, 2.38 mmol) was catalyzed by Cp*Rh(4-C6Me6) (10.0 mg, 0.025 mmol) in cyclohexane (1 mL) at 150 °C for 19 h. The product ratio of 1,3,5-C6H3(OCH3)(NMe2)(BPin) to another unidentified mono-borylated product, determined by GC-FID of the crude reaction mixture, was 95:5. 1,3,5-C6H3(OCH3)(NMe2)(BPin) (124 mg, 75%) was isolated as a colorless solid after sublimation (0.03 mmHg, 80 °C). 1,3,5-C6H3(OCH3)(NMe2)(BPin): mp 64-66 °C. *Rf* = 0.33 (hexanes:ethyl acetate = 9:1). 1H NMR (CDCl3)  1.32 (s, 12 H, BO2C6H12), 2.93 (s, 6 H, NMe2), 3.81 (s, 3 H, OCH3), 6.37 (unresolved dd, 1 H), 6.70 (d, *J* = 2.2 Hz, 1 H), 6.82 (d, *J* = 2.5 Hz, 1 H). 13C NMR (CDCl3)  24.81, 40.72, 55.26, 83.65, 102.90, 106.22, 112.27, 151.59, 160.14. 11B NMR (CDCl3)  30.8. Elemental analysis for C15H24BNO3 calcd. C (65.00%), H (8.73%), N (5.05%). Found C (65.25%), H (8.98%), N (4.86%). GC-MS (*m/z*) 277.

**5-(4,4,5,5-Tetramethyl-1,3,2-dioxaborolyl)-1,3-*N*,*N,N’,N’*-tetramethyl-phenylenediamine.** In an air-free flask, the borylation of 1,3-*N*,*N,N’,N’*-tetramethylphenylenediamine3 (115 mg, 0.70 mmol) with HBPin (269 mg, 2.10 mmol) was catalyzed by Cp*Rh(4-C6Me6) (15.0 mg, 0.037 mmol) in cyclohexane (1 mL) at 150 °C for 28 h. The product ratio of 1,3,5-C6H3(NMe2)2(BPin) to another unidentified mono-borylated product, determined by GC-FID of the crude reaction mixture, was 97:3. 1,3,5-C6H3(NMe2)2(BPin) (140 mg, 69%) was isolated as a colorless solid after recrystallization from hot cyclohexane. 1,3,5-C6H3(NMe2)2(BPin): mp 178-180 °C. *Rf* = 0.22 (hexanes:ethyl acetate = 5:1). 1H NMR (CDCl3)  1.32 (s, 12 H, BO2C6H12), 2.94 (s, 12 H, 2 NMe2), 3.81 (s, 3 H, OCH3), 6.23 (t, *J* = 2.2 Hz, 1 H), 6.65 (d, *J* = 2.2 Hz, 2 H). 13C NMR (CDCl3)  24.81, 41.05, 83.43, 101.30, 108.77, 151.38. 11B NMR (CDCl3)  31.0. HRMS for C16H27BN2O2 calcd. 290.2169, found 290.2167. GC-MS (*m/z*) 290.

**3-(4,4,5,5-Tetramethyl-1,3,2-dioxaborolyl)-*N*-tri-*iso*-propylsilylpyrrole.** In an air-free flask, the borylation of *N*-tri-*iso*-propylsilylpyrrole4 (156 mg, 0.70 mmol) with HBPin (269 mg, 2.10 mmol) was catalyzed by Cp*Rh(4-C6Me6) (10.0 mg, 0.025 mmol) in cyclohexane (1 mL) at 150 °C for 41 h. The product ratio of *N*-*i*Pr3Si-pyrrole-3-BPin to an unidentified mono-borylated product, determined by GC-FID of the crude reaction mixture, was 99:1. *N*-*i*Pr3Si-pyrrole-3-BPin (199 mg, 81%) was isolated as colorless oil after chromatography on silica gel using hexanes to hexanes:ethyl acetate (20:1) as the gradient eluent. . *N*-*i*Pr3Si-pyrrole-3-BPin: *Rf* = 0.43 (hexanes:ethyl acetate = 20:1). 1H NMR (CDCl3)  1.06 (d, *J*= 7.3 Hz, 18 H, 6 CH3), 1.30 (s, 12 H, BO2C6H12), 1.44 (septet, *J* = 7.3 Hz, 3 H, 3 CH), 6.60 (dd, *J* = 2.7, 1.2 Hz, 1 H), 6.79 (dd, *J* = 2.7, 2.0 Hz, 1 H), 7.21-7.22 (unresolved dd, 1 H). 13C NMR (CDCl3)  11.62, 17.78, 24.84, 82.69, 115.57, 124.96, 133.65. 11B NMR (CDCl3)  30.5. HRMS for C16H27BN2O2 calcd. 349.2612, found 349.2602. GC-MS (*m/z*) 290.

**Borylation of 1,3-dichlorobenzene**: In a J. Young NMR tube, the borylation of 1,3-dichlorobenzene (103 mg, 0.70 mmol) with HBPin (90 mg, 0.70 mmol) was catalyzed by Cp*Rh(4-C6Me6) (5.0 mg, 0.012 mmol) in cyclohexane (0.5 mL) at 150 °C for 7 h. A mixture of borylation and reduction products was obtained as determined by GC-MS of the crude reaction mixture. The product ratio of chlorobenzene, unreacted 1,3-dichlorobenzene, PhBPin, ClC6H4(BPin), 1,3-Cl2C6H4(BPin) and ClC6H3(BPin)2, determined by GC-FID of the crude reaction mixture, was 19:30:2:14:31:5.

1. Bowyer, W. J.; Merkert, J. W.; and Geiger, W. E. *Organometallics*, **1989***, 8*, 191-198. [↑](#footnote-ref-2)
2. Giumanini, A. G.; Chiavari, G.; Musiani, M. M.; Rossi, P. *Synth.* **1980**, 743-746. [↑](#footnote-ref-3)
3. Torf, S. F.; Khromov-Borisov, N. V. *Zhur. Obshchei Khim.* **1960**, *30*, 1798-1805. [↑](#footnote-ref-4)
4. Bray, B. L.; Mathies, P. H.; Naef, R.; Solas, D. R.; Tidwell, T. T.; Artis, D. R.; Muchowski, J. M. *J. Org.* *Chem.* **1990**, *55*, 6317-6328. [↑](#footnote-ref-5)
5. Murata, M.; Oyama, T.; Watanabe, S.; Masuda, Y. *J. Org. Chem.* **2000**, *65*, 164-168. [↑](#footnote-ref-6)
6. Cho, J.-Y.; Iverson, C. N.; Smith, M. R., III. *J. Am. Chem. Soc.* **2000**, *122*, 12868-12869. [↑](#footnote-ref-7)
